# Supplementary material for: SigMat: a classification scheme for gene signature matching
Source: Oxford University Press journal article supplement (doi:10.1093/bioinformatics/bty251), 2018-04-17
Supplement: bioinformatics_34_13_i547_s1.pdf [file bioinformatics_34_13_i547_s1.pdf]

## Supplementary Material

# SigMat: A Classification Scheme for Gene Signature Matching

Jinfeng Xiao<sup>1</sup>, Charles Blatti<sup>1</sup> and Saurabh Sinha<sup>1,2,\*</sup>

<sup>1</sup>Department of Computer Science, University of Illinois at Urbana-Champaign

<sup>2</sup>Carl R. Woese Institute for Genomic Biology, University of Illinois at Urbana-Champaign

\*To whom correspondence should be addressed.

**Supplementary Table 1.** Number of drugs shared between pairs of cell lines, so that each cell line has at least 10 experiments on each drug.

|        | A375 | A549 | HA1E | HT29 | MCF7  | PC3   | VCAP  | HCC515 | HEPG2 |
|--------|------|------|------|------|-------|-------|-------|--------|-------|
| A375   | 654  | 323  | 442  | 572  | 632   | 619   | 305   | 443    | 131   |
| A549   |      | 546  | 270  | 413  | 546   | 530   | 384   | 275    | 131   |
| HA1E   |      |      | 527  | 434  | 453   | 449   | 173   | 402    | 127   |
| HT29   |      |      |      | 781  | 774   | 748   | 450   | 435    | 133   |
| MCF7   |      |      |      |      | 2,278 | 1,456 | 969   | 460    | 153   |
| PC3    |      |      |      |      |       | 3,440 | 1,985 | 447    | 152   |
| VCAP   |      |      |      |      |       |       | 3,370 | 152    | 50    |
| HCC515 |      |      |      |      |       |       |       | 466    | 129   |
| HEPG2  |      |      |      |      |       |       |       |        | 244   |

**Supplementary Table 2.** Number of drugs shared between the training cell lines (columns) and the testing cell lines (rows) in Section 3.6. Each training cell line contains the top 500 drugs with the greatest number of LINCS L1000 experiments on that cell line.

|        | A375 | A549 | HA1E | HT29 | MCF7 | PC3 | VCAP |
|--------|------|------|------|------|------|-----|------|
| HCC515 | 400  | 272  | 381  | 288  | 220  | 210 | 88   |
| HEPG2  | 129  | 131  | 125  | 129  | 95   | 97  | 17   |

| Success@K, K = |        | 1     |        |       |       |       | 5     |        |        |       |       | 10    |       |        |        |       |       |       |       |        |
|----------------|--------|-------|--------|-------|-------|-------|-------|--------|--------|-------|-------|-------|-------|--------|--------|-------|-------|-------|-------|--------|
| train          | test   | tune% | SigMat | cor   | RF    | SVM   | KS    | random | SigMat | cor   | RF    | SVM   | KS    | random | SigMat | cor   | RF    | SVM   | KS    | random |
| A375           | HCC515 | 0.05  | 0.084  | 0.084 | 0.082 | 0.034 | 0.003 | 0.002  | 0.241  | 0.186 | 0.197 | 0.129 | 0.014 | 0.010  | 0.322  | 0.247 | 0.264 | 0.159 | 0.031 | 0.020  |
|                | HEPG2  | 0.5   | 0.104  | 0.076 | 0.078 | 0.032 | 0.004 | 0.002  | 0.244  | 0.175 | 0.191 | 0.117 | 0.013 | 0.010  | 0.309  | 0.241 | 0.258 | 0.143 | 0.030 | 0.020  |
| A549           | HCC515 | 0.05  | 0.052  | 0.049 | 0.039 | 0.036 | 0.004 | 0.002  | 0.160  | 0.148 | 0.105 | 0.130 | 0.022 | 0.010  | 0.212  | 0.192 | 0.153 | 0.183 | 0.037 | 0.020  |
|                | HEPG2  | 0.5   | 0.053  | 0.053 | 0.039 | 0.036 | 0.002 | 0.002  | 0.170  | 0.150 | 0.111 | 0.123 | 0.012 | 0.010  | 0.239  | 0.202 | 0.159 | 0.170 | 0.025 | 0.020  |
| HA1E           | HCC515 | 0.05  | 0.124  | 0.120 | 0.097 | 0.055 | 0.003 | 0.002  | 0.244  | 0.234 | 0.195 | 0.125 | 0.020 | 0.010  | 0.291  | 0.291 | 0.248 | 0.163 | 0.038 | 0.020  |
|                | HEPG2  | 0.5   | 0.129  | 0.105 | 0.079 | 0.045 | 0.002 | 0.002  | 0.252  | 0.212 | 0.166 | 0.108 | 0.019 | 0.010  | 0.315  | 0.260 | 0.207 | 0.149 | 0.037 | 0.020  |
| HT29           | HCC515 | 0.05  | 0.073  | 0.058 | 0.036 | 0.030 | 0.002 | 0.002  | 0.178  | 0.142 | 0.102 | 0.119 | 0.020 | 0.010  | 0.245  | 0.202 | 0.156 | 0.164 | 0.040 | 0.020  |
|                | HEPG2  | 0.5   | 0.088  | 0.069 | 0.038 | 0.026 | 0.000 | 0.002  | 0.206  | 0.149 | 0.103 | 0.109 | 0.011 | 0.010  | 0.282  | 0.202 | 0.154 | 0.158 | 0.034 | 0.020  |
| MCF7           | HCC515 | 0.05  | 0.149  | 0.124 | 0.091 | 0.044 | 0.002 | 0.002  | 0.295  | 0.237 | 0.225 | 0.116 | 0.016 | 0.010  | 0.365  | 0.307 | 0.293 | 0.156 | 0.031 | 0.020  |
|                | HEPG2  | 0.5   | 0.149  | 0.127 | 0.095 | 0.041 | 0.003 | 0.002  | 0.301  | 0.244 | 0.237 | 0.114 | 0.017 | 0.010  | 0.374  | 0.313 | 0.309 | 0.155 | 0.035 | 0.020  |
| PC3            | HCC515 | 0.05  | 0.053  | 0.057 | 0.025 | 0.025 | 0.003 | 0.002  | 0.135  | 0.126 | 0.091 | 0.094 | 0.016 | 0.010  | 0.185  | 0.168 | 0.145 | 0.142 | 0.031 | 0.020  |
|                | HEPG2  | 0.5   | 0.081  | 0.074 | 0.032 | 0.035 | 0.005 | 0.002  | 0.145  | 0.145 | 0.116 | 0.126 | 0.016 | 0.010  | 0.211  | 0.176 | 0.174 | 0.182 | 0.037 | 0.020  |
| VCAP           | HCC515 | 0.05  | 0.116  | 0.089 | 0.071 | 0.031 | 0.003 | 0.002  | 0.233  | 0.181 | 0.162 | 0.101 | 0.019 | 0.010  | 0.294  | 0.236 | 0.224 | 0.143 | 0.039 | 0.020  |
|                | HEPG2  | 0.5   | 0.088  | 0.065 | 0.048 | 0.029 | 0.001 | 0.002  | 0.192  | 0.140 | 0.137 | 0.091 | 0.017 | 0.010  | 0.254  | 0.186 | 0.201 | 0.130 | 0.031 | 0.020  |
| MCF7           | HCC515 | 0.05  | 0.056  | 0.057 | 0.040 | 0.021 | 0.007 | 0.002  | 0.146  | 0.161 | 0.114 | 0.109 | 0.020 | 0.010  | 0.198  | 0.220 | 0.157 | 0.165 | 0.031 | 0.020  |
|                | HEPG2  | 0.5   | 0.045  | 0.044 | 0.039 | 0.025 | 0.003 | 0.002  | 0.172  | 0.153 | 0.114 | 0.109 | 0.014 | 0.010  | 0.222  | 0.203 | 0.152 | 0.162 | 0.025 | 0.020  |
| PC3            | HCC515 | 0.05  | 0.171  | 0.135 | 0.112 | 0.059 | 0.001 | 0.002  | 0.265  | 0.241 | 0.228 | 0.133 | 0.018 | 0.010  | 0.307  | 0.289 | 0.283 | 0.173 | 0.040 | 0.020  |
|                | HEPG2  | 0.5   | 0.150  | 0.115 | 0.087 | 0.051 | 0.003 | 0.002  | 0.268  | 0.212 | 0.204 | 0.117 | 0.023 | 0.010  | 0.337  | 0.273 | 0.264 | 0.157 | 0.040 | 0.020  |
| MCF7           | HCC515 | 0.05  | 0.043  | 0.036 | 0.026 | 0.021 | 0.002 | 0.002  | 0.111  | 0.111 | 0.090 | 0.060 | 0.014 | 0.010  | 0.169  | 0.170 | 0.127 | 0.083 | 0.023 | 0.020  |
|                | HEPG2  | 0.5   | 0.057  | 0.043 | 0.028 | 0.030 | 0.002 | 0.002  | 0.126  | 0.115 | 0.096 | 0.066 | 0.015 | 0.010  | 0.191  | 0.194 | 0.130 | 0.091 | 0.021 | 0.020  |
| PC3            | HCC515 | 0.05  | 0.094  | 0.070 | 0.052 | 0.025 | 0.002 | 0.002  | 0.202  | 0.159 | 0.138 | 0.086 | 0.017 | 0.010  | 0.248  | 0.204 | 0.175 | 0.117 | 0.030 | 0.020  |
|                | HEPG2  | 0.5   | 0.088  | 0.063 | 0.049 | 0.023 | 0.003 | 0.002  | 0.197  | 0.137 | 0.132 | 0.079 | 0.016 | 0.010  | 0.246  | 0.184 | 0.174 | 0.108 | 0.030 | 0.020  |
| VCAP           | HCC515 | 0.05  | 0.057  | 0.046 | 0.039 | 0.016 | 0.003 | 0.002  | 0.147  | 0.125 | 0.110 | 0.095 | 0.011 | 0.010  | 0.199  | 0.170 | 0.161 | 0.120 | 0.024 | 0.020  |
|                | HEPG2  | 0.5   | 0.050  | 0.033 | 0.035 | 0.015 | 0.002 | 0.002  | 0.129  | 0.100 | 0.098 | 0.090 | 0.008 | 0.010  | 0.183  | 0.142 | 0.152 | 0.112 | 0.027 | 0.020  |
| VCAP           | HCC515 | 0.05  | 0.043  | 0.060 | 0.065 | 0.022 | 0.004 | 0.002  | 0.182  | 0.182 | 0.154 | 0.099 | 0.016 | 0.010  | 0.124  | 0.228 | 0.208 | 0.157 | 0.030 | 0.020  |
|                | HEPG2  | 0.5   | 0.102  | 0.052 | 0.059 | 0.030 | 0.007 | 0.002  | 0.230  | 0.189 | 0.168 | 0.105 | 0.016 | 0.010  | 0.302  | 0.223 | 0.225 | 0.155 | 0.027 | 0.020  |
| MCF7           | HCC515 | 0.05  | 0.062  | 0.144 | 0.088 | 0.006 | 0.000 | 0.002  | 0.238  | 0.238 | 0.231 | 0.119 | 0.019 | 0.010  | 0.288  | 0.288 | 0.312 | 0.206 | 0.038 | 0.020  |
|                | HEPG2  | 0.5   | 0.138  | 0.150 | 0.125 | 0.012 | 0.000 | 0.002  | 0.312  | 0.238 | 0.275 | 0.138 | 0.000 | 0.010  | 0.425  | 0.288 | 0.412 | 0.275 | 0.025 | 0.020  |

**Supplementary Table 3.** Success@K (K = 1, 5 or 10) for SigMat and other methods under 28 combinations of 7 training cell lines, 2 testing cell lines, and 2 different percentages of testing drugs allowed for SigMat tuning. Best viewed in color.
